# Supplementary material
Source: MDPI journal article supplement (https://www.mdpi.com/2571-841X/5/4/43)
Supplement: s1 [file s1]

Archive with 1 entries (1 files):
- reports-1849839-supplementary.pdf
